# Supplementary material for: Silkworm HP1a transcriptionally enhances highly expressed euchromatic genes via association with their transcription start sites
Source: PubMed Central journal article supplement — Nucleic Acids Res. 2014 Sep 18;42(18):11462–71. doi: 10.1093/nar/gku862 (PMC4191426; doi:10.1093/nar/gku862), 2014-09-18
Supplement: supp_gku862_nar-01415-x-2014-File009.pdf [file supp_gku862_nar-01415-x-2014-File009.pdf]

1 **Legends for Supplementary Figures**

2

3 **Fig. S1. Expression profiling of *BmHP1a* and *BmHP1b*.**

4 The *BmHP1a* (A) and *BmHP1b* (B) mRNA expression levels in 17 different tissues  
5 from day three fifth-instar larvae. RT-qPCR was performed using total RNA from the  
6 brain (BR), prothoracic gland (PG), salivary gland (SG), fat body (FB), trachea (TR),  
7 hemocyte (HC), testis (TES), ovary (OV), anterior silk gland (ASG), middle silk gland  
8 (MSG), posterior silk gland (PSG), foregut (FG), midgut (MG), hindgut (HG),  
9 Malpighian tubules (MT), integument (IG), and BmN4 cells (BmN). *rp49* was used as  
10 an internal control.

11

12 **Fig. S2. BmHP1a enrichment for 121 well-annotated silkworm transposons.**

13 We mapped the ChIP-seq data from BmHP1a-BmN4 and pIZ-BmN4 (control) cells to  
14 121 well-annotated silkworm transposons. Transposons shown in red letters are known  
15 to belong to the telomere-specific transposon family.

16

17 **Fig. S3. Four additional histone marks and RNA polymerase II binding for Fig. 2.**

18 The ChIP-seq data for one euchromatic mark (H3K27ac), two heterochromatic marks  
19 (H3K27me3, H3K36me3), one enhancer mark (H3K4me1) and RNA polymerase II  
20 (Pol2)-binding sites were added to Fig. 2A.

21

22 **Fig. S4. An example of a BmHP1a-binding locus observed on chromosome 23.**

23 (A) The BmHP1a-binding locus on chromosome 23: 9,344,991–9,366,591. The mapped  
24 reads were visualized using the Genome studio (Illumina). The BmHP1a binding region  
25 is indicated by the orange box. At this locus, BmHP1a binds to the upstream region of  
26 two head-to-head located genes, *BGIBMGA011491* and *BGIBMGA011523*.

27 (B–C) ChIP-qPCR experiments. The ChIP-seq data in Fig. S4A were validated by  
28 ChIP-qPCR. The locations of the primers are indicated in Fig. S4A. The BmHP1a  
29 binding region is indicated by the orange box. The data are shown as means  $\pm$  SD (n =  
30 3). \*\*  $P < 0.01$  with Student's *t*-test.

31

32 **Fig. S5. Expression levels of the gene groups classified according to the distance**  
33 **between each gene and the nearest BmHP1a peak.**

34 The data are shown as *box-and-whisker* diagrams. The boxes represent the medians and  
35 the 25<sup>th</sup>–75<sup>th</sup> percentile ranges of the expression levels. The *whiskers* indicate the most  
36 extreme data points, which were no more than 1.5-fold beyond the interquartile ranges  
37 represented by the *boxes*. Data were subjected to pair-wise *t*-tests for all combinations.  
38 Statistically significant values ( $P < 0.05$ ) are indicated by different letters.

39

40 **Fig. S6. RT-qPCR analysis of the genes that were examined in Fig. 6B–D following**  
41 **treatment of NIAS-Bm-M1 cells with *BmHP1a* siRNA.**

42 (A) RT-qPCR analysis of the five genes examined in Fig. 6B in *BmHP1a*  
43 siRNA-transfected NIAS-Bm-M1 cells.

44 (B) RT-qPCR analysis of the five genes examined in Fig. 6C in *BmHP1a*  
45 siRNA-transfected NIAS-Bm-M1 cells.

46 (C) RT-qPCR analysis of the five genes examined in Fig. 6D in *BmHP1a*  
47 siRNA-transfected NIAS-Bm-M1 cells.

48 \*  $P < 0.05$ , \*\*  $P < 0.01$  with Student's *t*-test. The data are shown as means  $\pm$  SD ( $n = 3$ ).

49

50 **Fig. S7. RT-qPCR analysis of the genes that were examined in Fig. 6B–D following**  
51 **treatment of BmVF cells with *BmHP1a* siRNA.**

52 (A) RT-qPCR analysis of the five genes examined in Fig. 6B in *BmHP1a*  
53 siRNA-transfected BmVF cells.

54 (B) RT-qPCR analysis of the five genes examined in Fig. 6C in *BmHP1a*  
55 siRNA-transfected BmVF cells.

56 (C) RT-qPCR analysis of the five genes examined in Fig. 6D in *BmHP1a*  
57 siRNA-transfected BmVF cells.

58 \*  $P < 0.05$ , \*\*  $P < 0.01$  with Student's *t*-test. The data are shown as means  $\pm$  SD ( $n = 3$ ).

59

60 **Fig. S8. RT-qPCR analysis of the genes that were selected in Fig. 2A and Fig. S4**  
61 **following treatment with *BmHP1a* siRNA.**

62 RT-qPCR analysis of the four genes examined in Fig. 2A and Fig. S4 in *BmHP1a*  
63 siRNA-transfected cells.

64 \*  $P < 0.05$ , \*\*  $P < 0.01$  with Student's *t*-test. The data are shown as means  $\pm$  SD ( $n = 6$ ).

65

66 **Fig. S9. The levels of *BmHP1a* binding.**

67 The median of BmHP1a-binding level at 50-base resolution in a 2-kb region from the  
68 first nucleotide of the upregulated (red line), unchanged (black line) and downregulated  
69 (blue line) genes in the *BmHP1a*-depleted cells was shown in the upper panel. The raw  
70 data within 0.5-kb regions from the first nucleotide of the genes are shown in the lower  
71 panel as *box-and-whisker* diagrams. The boxes represent the medians and the 25<sup>th</sup>–75<sup>th</sup>  
72 percentile ranges of the modification levels. The *whiskers* indicate the most extreme  
73 data points, which were no more than 1.5-fold beyond the interquartile ranges  
74 represented by the *boxes*. \*  $P < 0.05$  with Student's *t*-test.

75

76 **Fig. S10. Tissue distributions of BmHP1a-regulated genes.**

77 The tissue distributions of upregulated (A) or downregulated (B) genes in  
78 *BmHP1a*-depleted cells were examined in a BLAST analysis, using the expressed  
79 sequence tags from 15 full-length cDNA libraries (Table S2).

80

81 **Fig. S11. RT-qPCR analysis of the genes that were examined in Fig. 6B–D**  
82 **following treatment with *BmHP1b* siRNA.**

83 (A) RT-qPCR analysis of the five genes examined in Fig. 6B in *BmHP1b*  
84 siRNA-transfected cells.

85 (B) RT-qPCR analysis of the five genes examined in Fig. 6C in *BmHP1b*  
86 siRNA-transfected cells.

87 (C) RT-qPCR analysis of the five genes examined in Fig. 6D in *BmHP1b*  
88 siRNA-transfected cells.

89 \*  $P < 0.05$ , \*\*  $P < 0.01$  with Student's *t*-test. The data are shown as means  $\pm$  SD (n = 6).

90

Shoji et al., Fig. S1

A

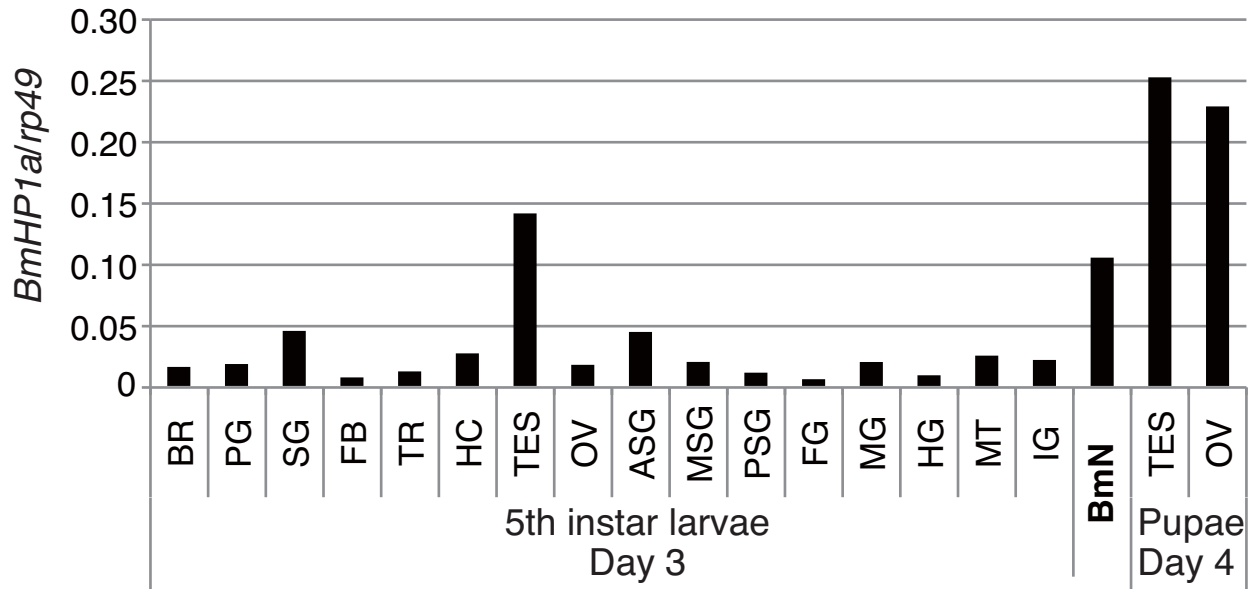

B

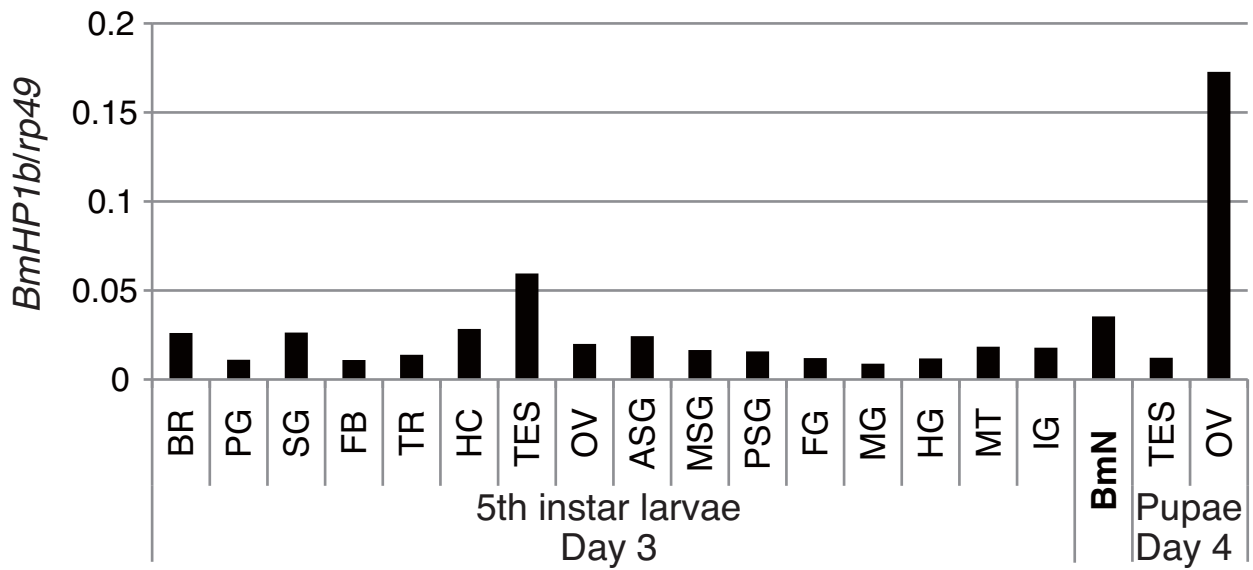

Shoji et al., Fig. S2

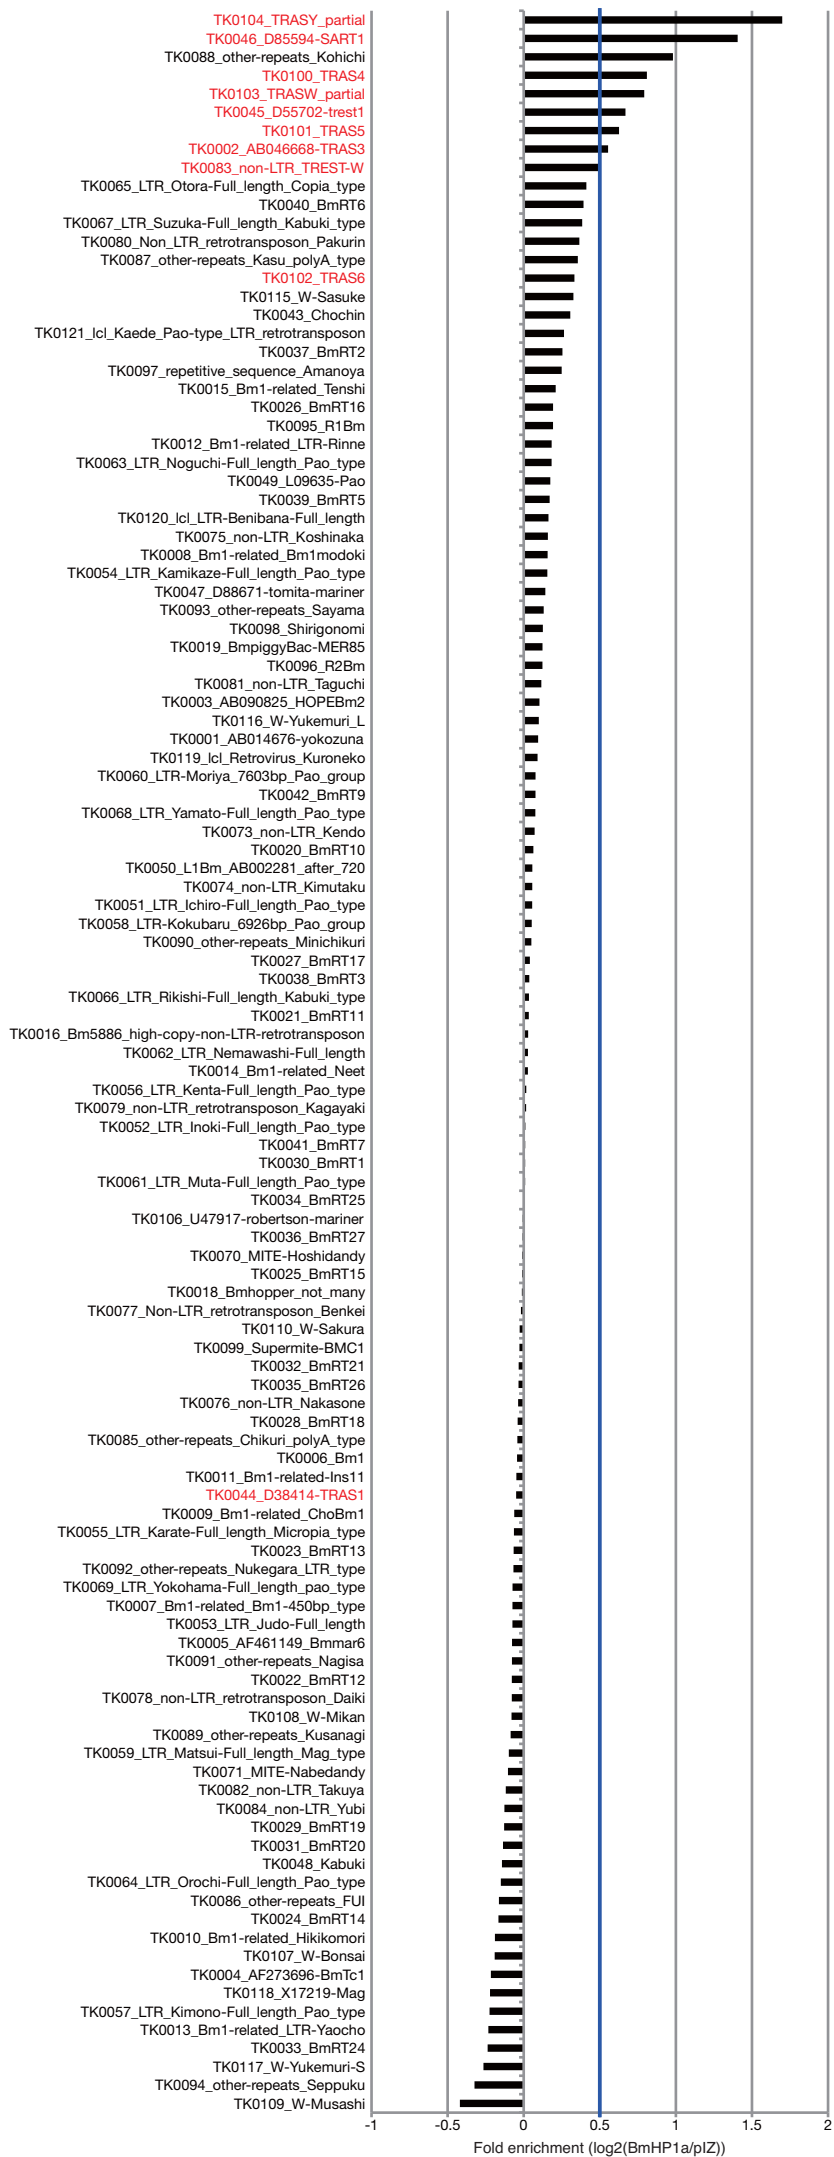

Shoji et al., Fig. S3

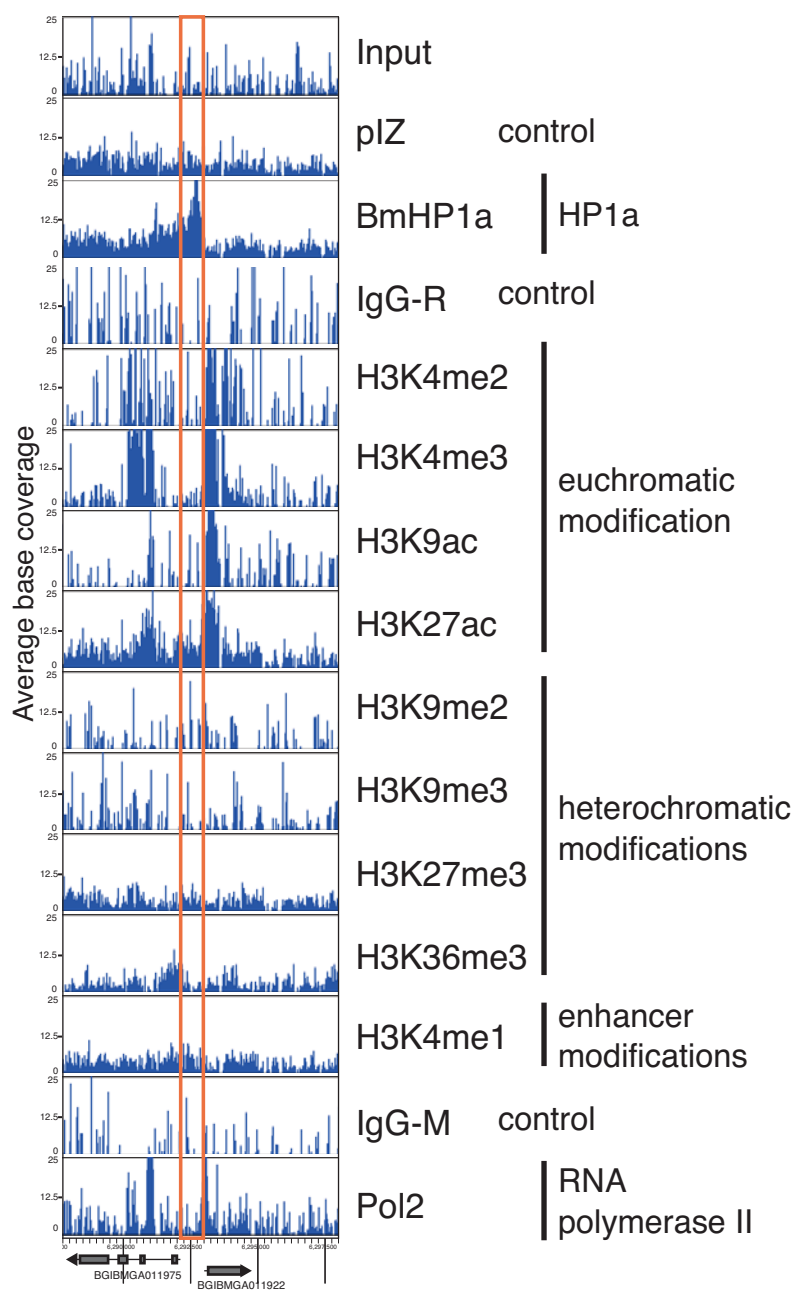

Shoji et al., Fig. S4

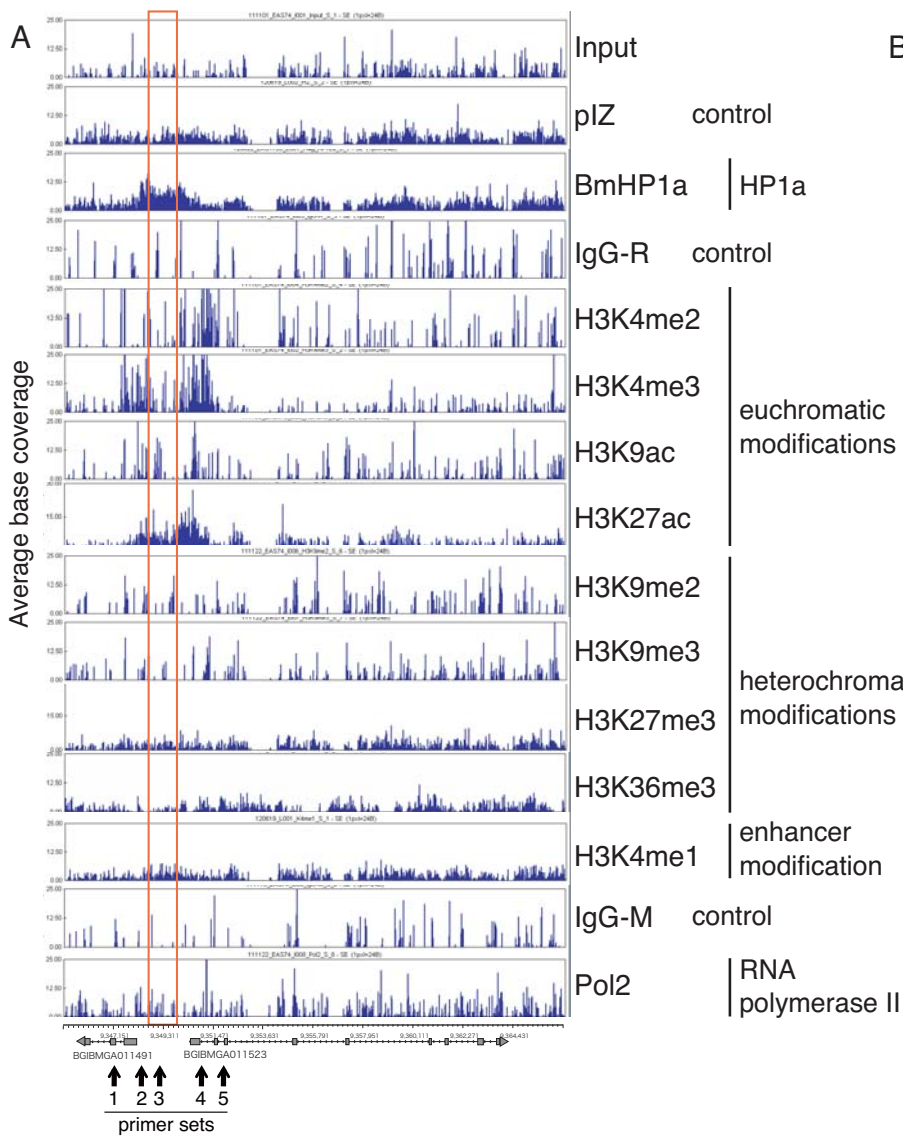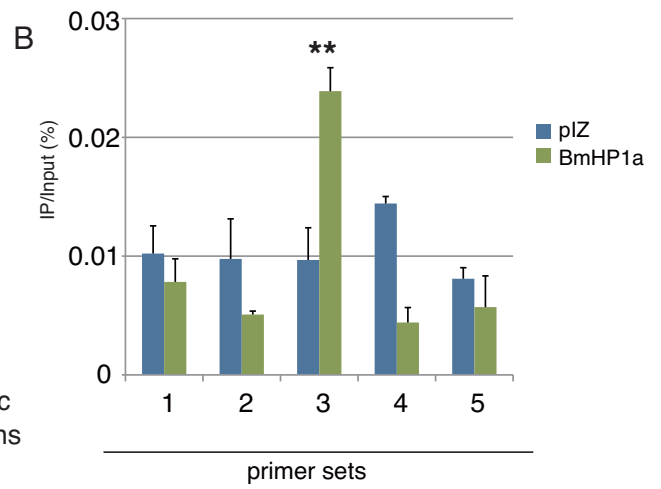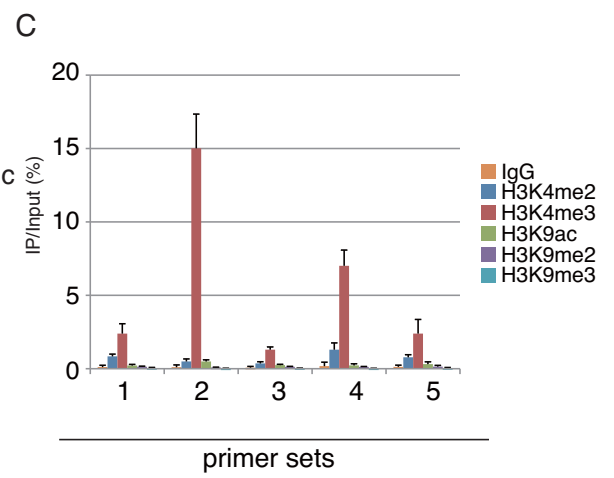

Shoji et al., Fig. S5

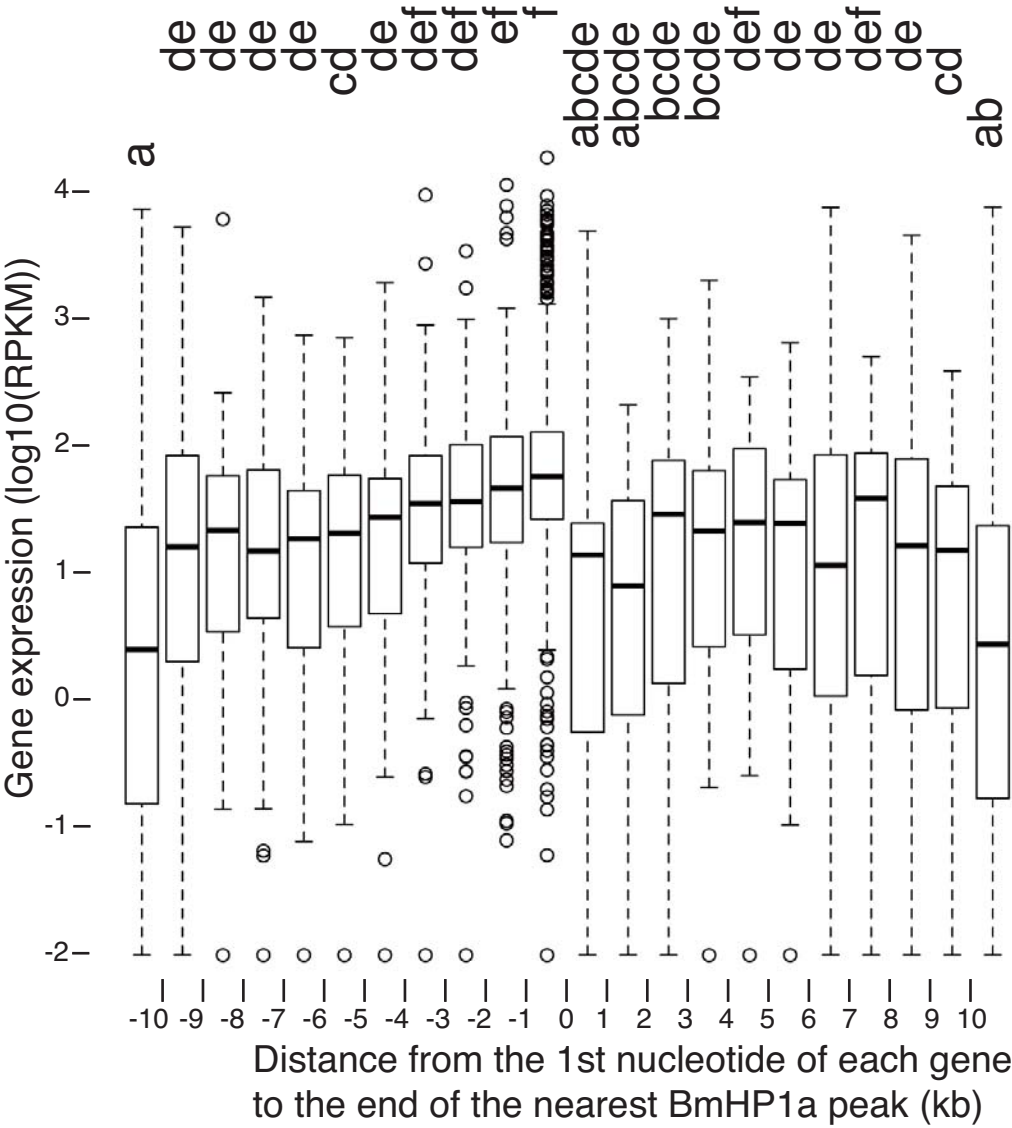



Shoji et al., Fig. S6

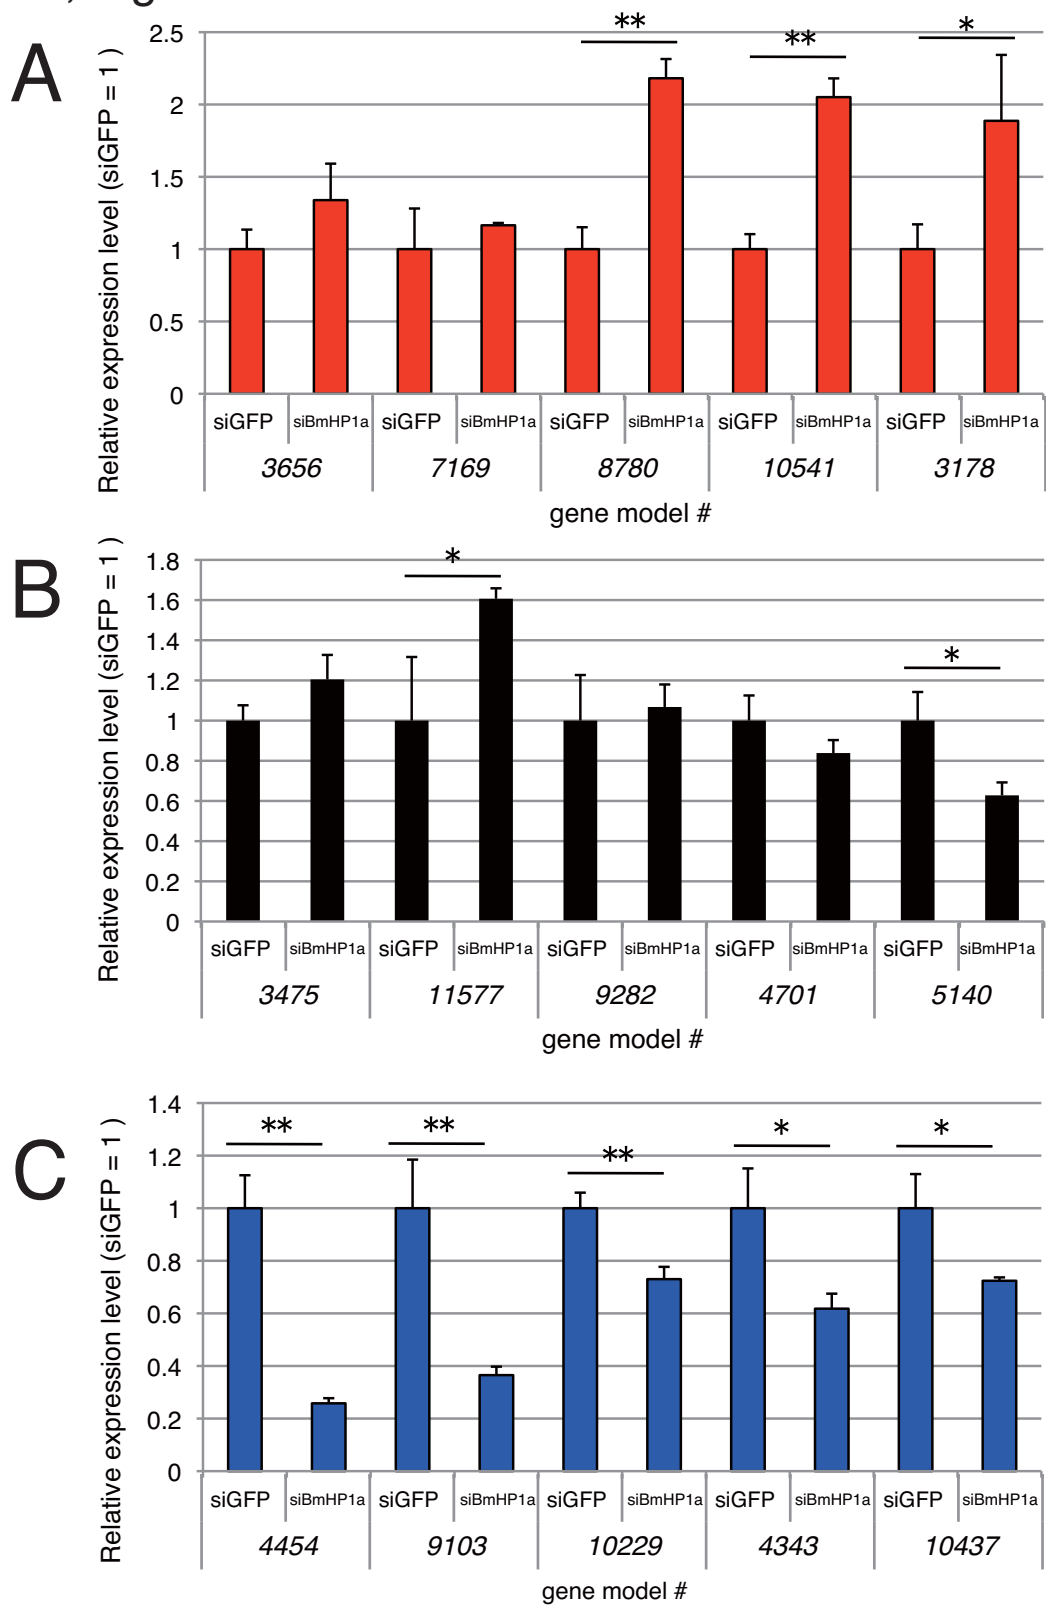

Shoji et al., Fig. S7

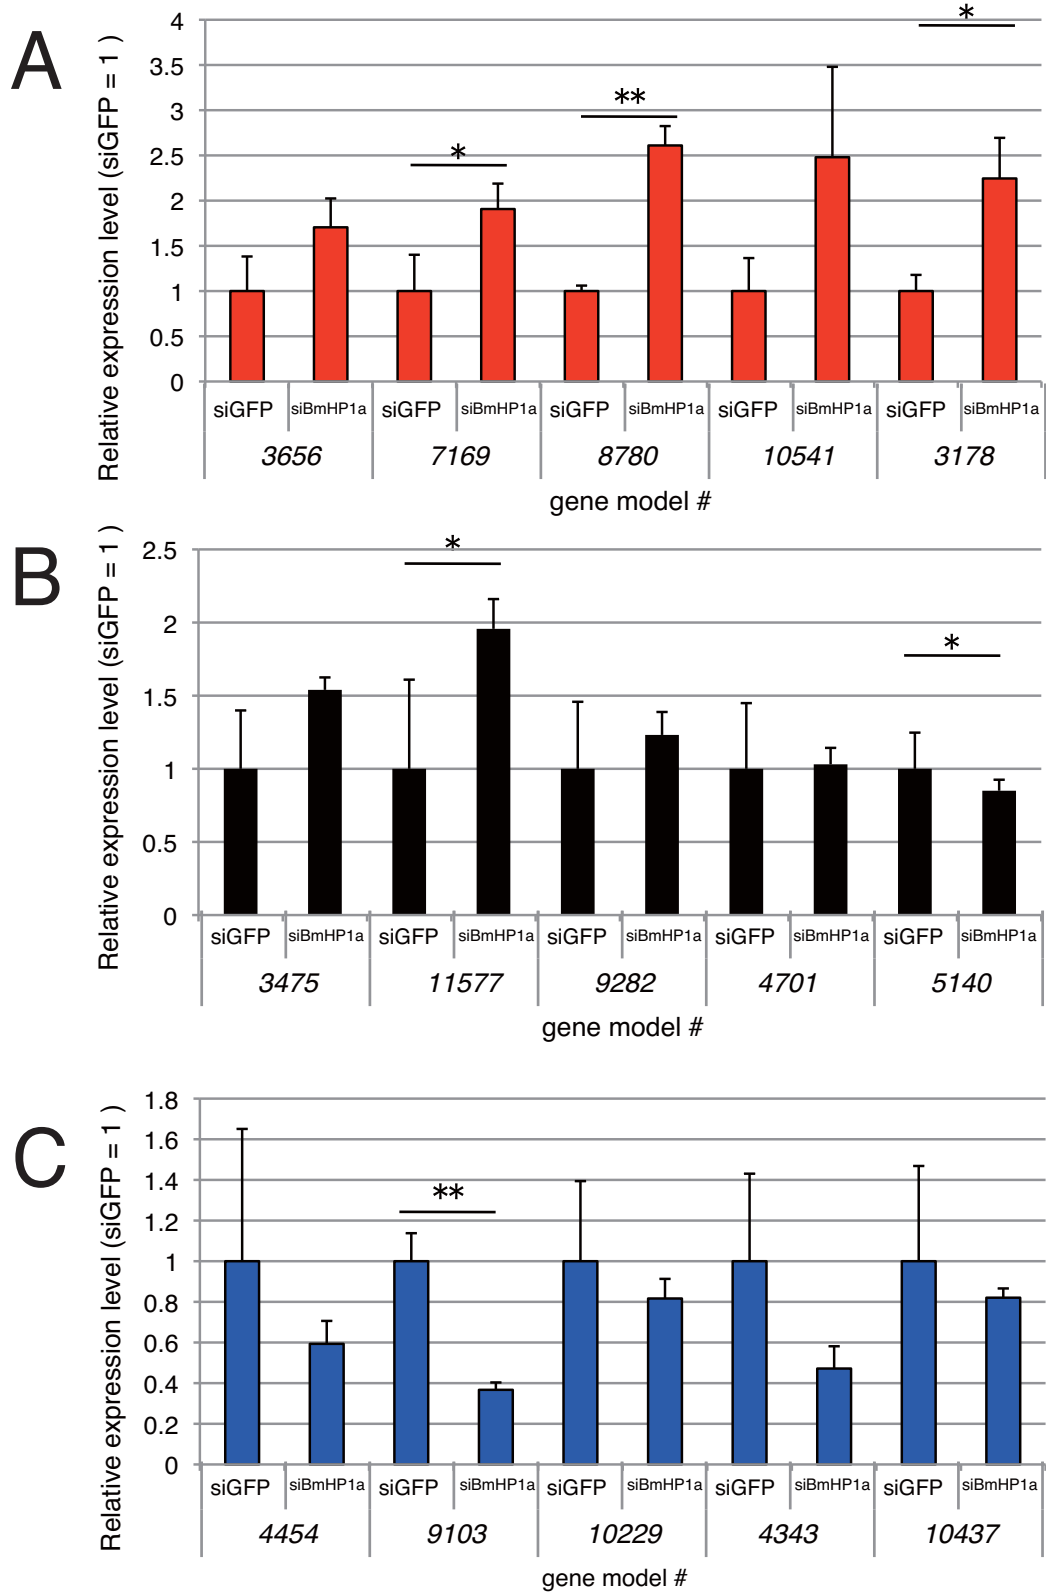

Shoji et al., Fig. S8

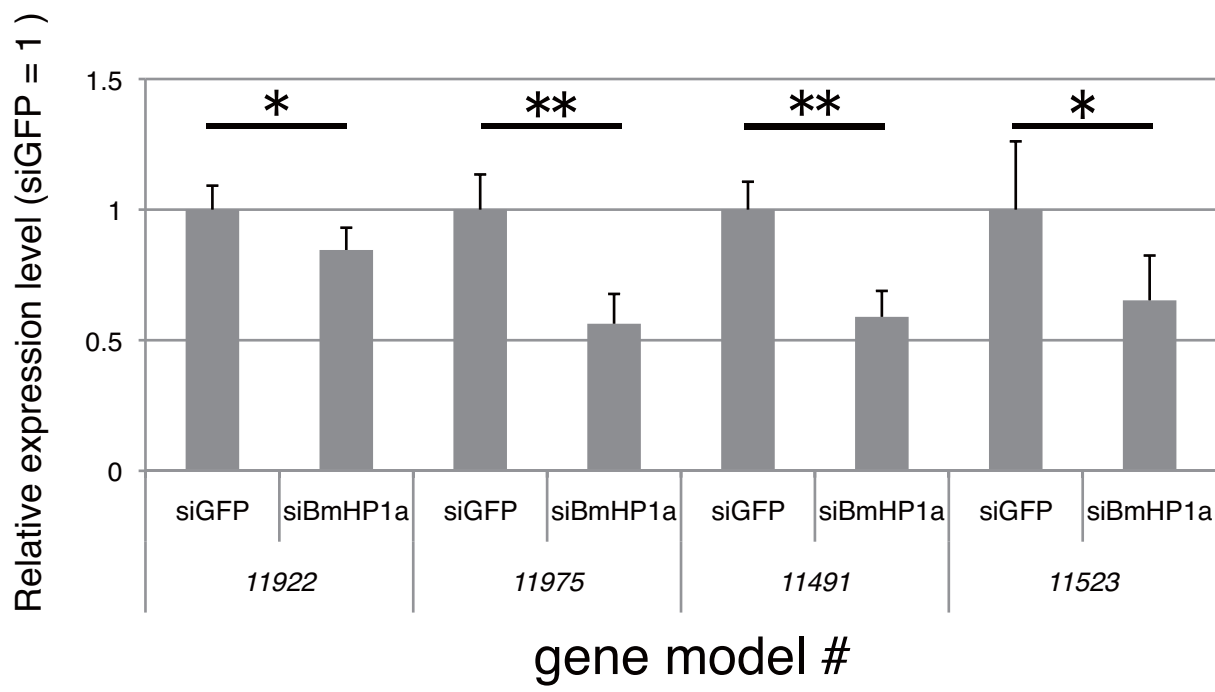

Shoji et al., Fig. S9

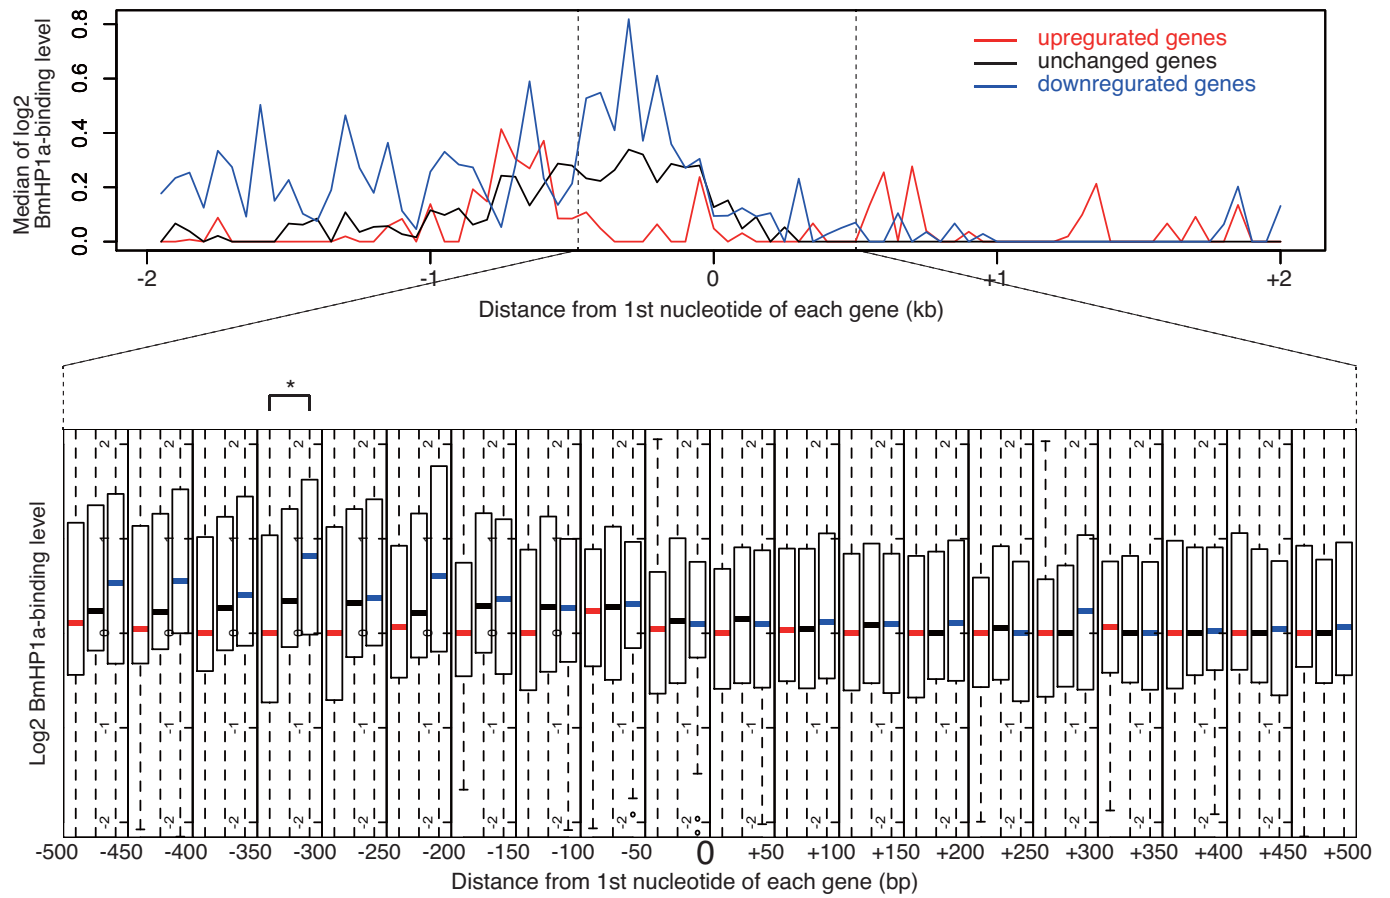

A

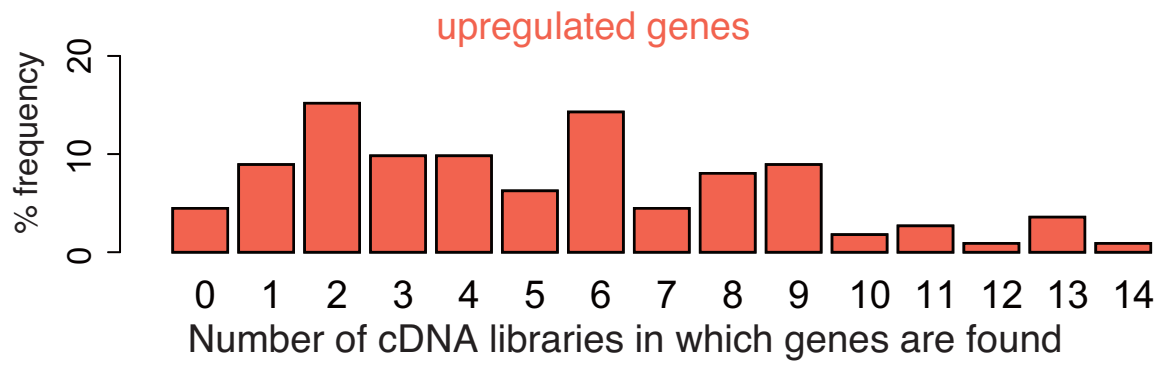

B

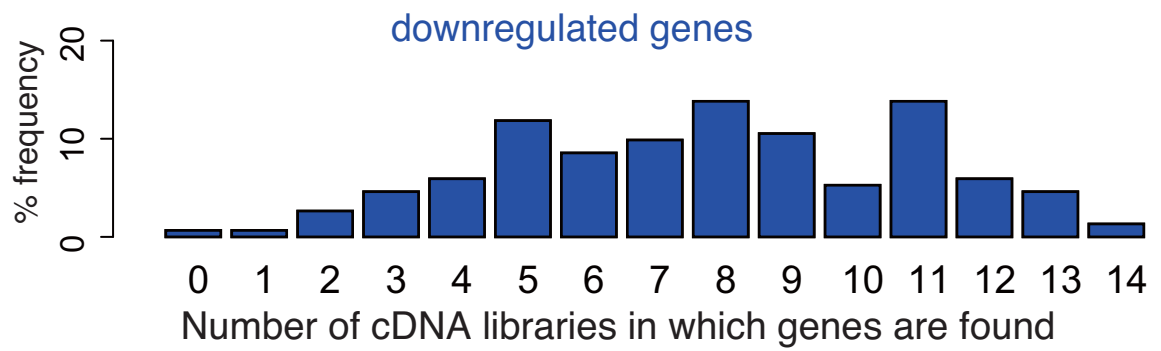

Shoji et al., Fig. S11

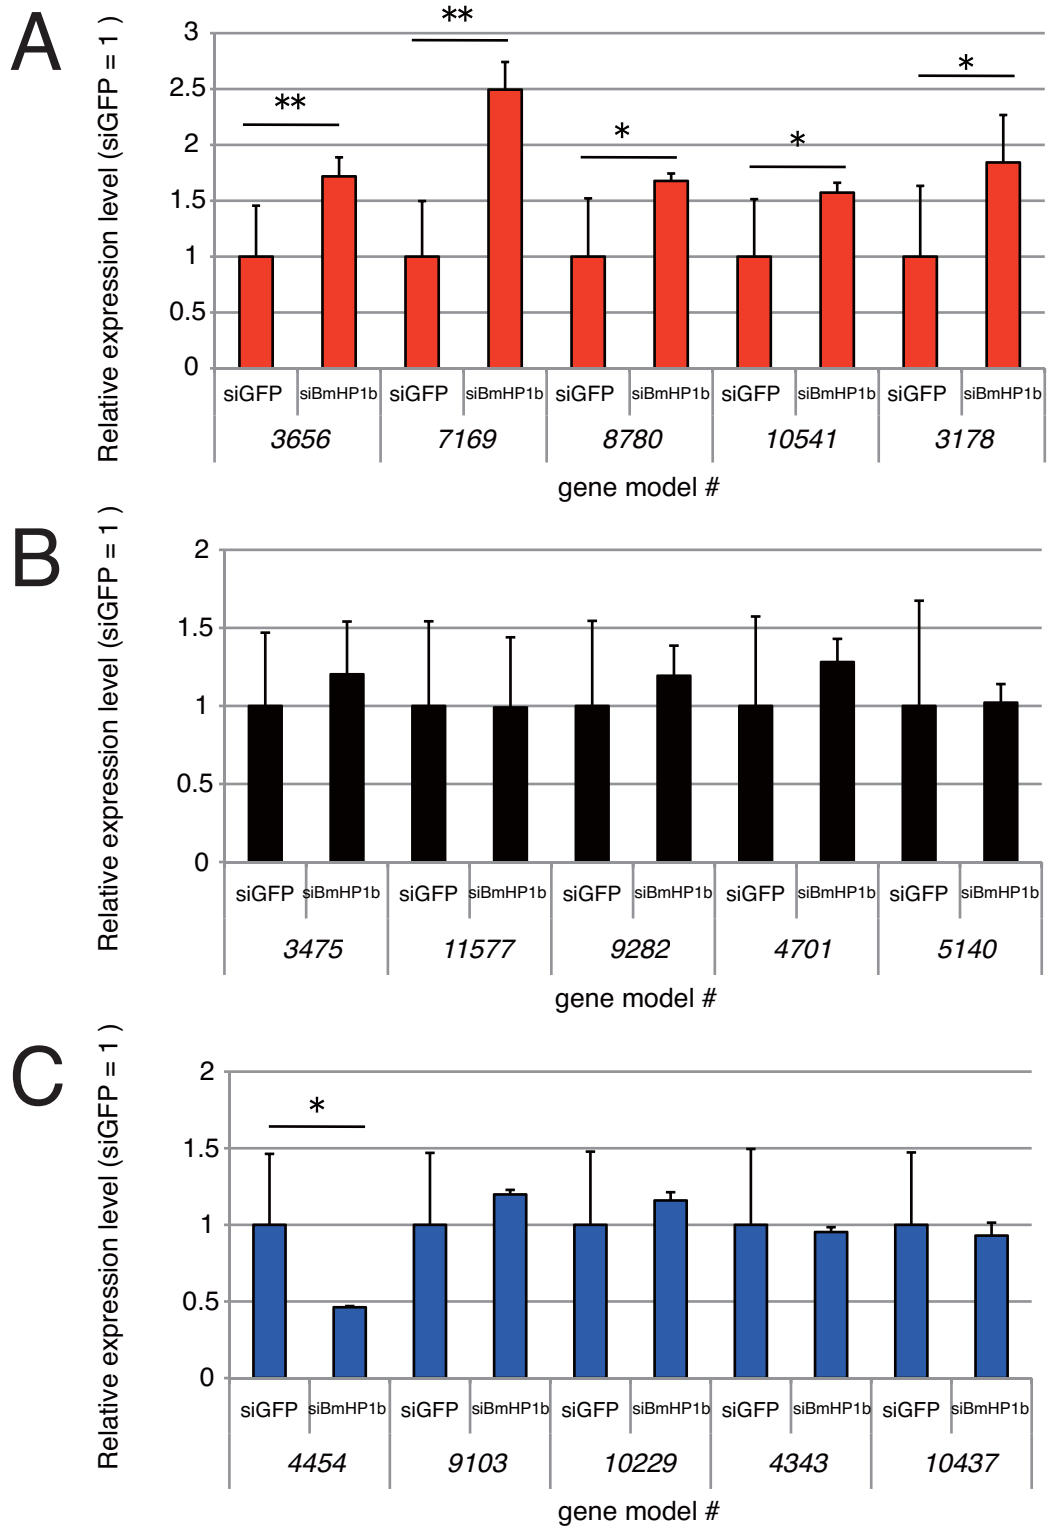

Supplementary Table 1. Oligonucleotide used in this study.

| Primer name     | Primer sequence (5'-3')  | purpose   |
|-----------------|--------------------------|-----------|
| 11922-1F        | GAAGCAGTTGATATCCACGAAAC  | ChIP-qPCR |
| 11922-1R        | GGGTTGTGTAATTCCATTCTGTG  |           |
| 11922-2F        | TCTGAGGGGTTACTTATTGGACA  |           |
| 11922-2R        | ACATGGCAAGAAGATTCAGCTA   |           |
| 11922-3F        | AGCCATCGTGTGGAATATAGATG  |           |
| 11922-3R        | CAGTCTAAAACGAGCAAGAGTCAA |           |
| 11922-4F        | CAGTCATGTCAACAGTCGGTAAA  |           |
| 11922-4R        | GAAACACTCCCTCAGGATCTTTT  |           |
| 11922-5F        | CTGGAAAATCTATCCGTGCAGTA  |           |
| 11922-5R        | TGCAATGGTCGTAGTCTAACTCA  |           |
| 11491-1F        | TCAATGAAATAGTTAACTTACCA  |           |
| 11491-1R        | CCCGGGTTTTAAGAATGAAGATC  |           |
| 11491-2F        | GGCGCAGTTTACCAACATAAA    |           |
| 11491-2R        | ATCATCGGTCGAGACGAAAA     |           |
| 11491-3F        | CTCCTCACGTTACCCCAAAA     |           |
| 11491-3R        | GCAAAC TAACGGAAGTGCAA    |           |
| 11491-4F        | ATCCTGGCCA ACTCAAACAG    |           |
| 11491-4R        | CCGCCCGTCAAATCTAAATA     |           |
| 11491-5F        | TTGATAAAAAATTGATGGTAATT  |           |
| 11491-5R        | TCAAGTGCAGCAGCGTGGGCGCA  |           |
| BGIBMGA003656-F | CGAACATACGAACACCCTAGAAG  | qPCR      |
| BGIBMGA003656-R | GTTTGTACCGCCGTATACATCAT  |           |
| BGIBMGA007169-F | GACCGAGTACAAATTGGTGGTT   |           |
| BGIBMGA007169-R | GTCTCTCATCGCCGAATACTCTT  |           |
| BGIBMGA008780-F | ATGAAGGTGTATGCTCTCATCGT  |           |
| BGIBMGA008780-R | CTACAACGTGGTTGTCCTTGAAT  |           |
| BGIBMGA010541-F | TGACAGTCCTTATCAAGGAGGAG  |           |
| BGIBMGA010541-R | AGAGCAACACTTTGGATATGGTG  |           |
| BGIBMGA003178-F | GGTCGTAGCAGTCAACCTTATTG  |           |

|                 |                          |
|-----------------|--------------------------|
| BGIBMGA003178-R | TGTCCGGAGAATAAGTAGACCAA  |
| BGIBMGA003475-F | GAATCATCCAGCAGTATCACCTC  |
| BGIBMGA003475-R | GACGCTCTTCCTTTATCTTAGCTG |
| BGIBMGA011577-F | GCTGAGAAAGATGAACAAGAGGA  |
| BGIBMGA011577-R | GGTATCCAAGCGAAGTCCTAGAT  |
| BGIBMGA009282-F | CAACCCTCGATACATAGAGGACA  |
| BGIBMGA009282-R | ACTCTTCGTAGATTTGCGGTAAG  |
| BGIBMGA004701-F | GTACCTCGGTA ACTCCACCAAC  |
| BGIBMGA004701-R | ATCTTATAGCCTGAGGGAAGTGC  |
| BGIBMGA005140-F | TCTTAATTCGGTGGGATACTGTG  |
| BGIBMGA005140-R | CTTTCTTCGTTCTTCCTCTTCG   |
| BGIBMGA004454-F | CTCTGAGCAAGGATCTAGACCAA  |
| BGIBMGA004454-R | TCTGTAGCATCGTCAGATGAGAA  |
| BGIBMGA009103-F | ACACTTATGGAGGCCAAGTTGTA  |
| BGIBMGA009103-R | CGTCACGTTTGAGAATCCTTTAC  |
| BGIBMGA010229-F | GACCCTCATCAATTTCACTTGTC  |
| BGIBMGA010229-R | TAGCACGCAACTCTAACCTTTTC  |
| BGIBMGA004343-F | GGTATGAGGATCACCCAACATAA  |
| BGIBMGA004343-R | CTGGAGTGAAGTCTGCATTACCT  |
| BGIBMGA010437-F | AAATCACA ACTGGGTCTTGGAAG |
| BGIBMGA010437-R | CCTTATGCGCCTTCTGTAGTTTT  |
| BGIBMGA11922-F  | CGGTAAAGTGATTAAGTGCTTGG  |
| BGIBMGA11922-R  | GAAACACTCCCTCAGGATCTTTT  |
| BGIBMGA11975-F  | GATATTGTAACCTGCCCACTCAG  |
| BGIBMGA11975-R  | GAAGCAGTTGATATCCACGAAAC  |
| BGIBMGA11491-F  | TTCTCCAGATGTAGTTGGAAAGC  |
| BGIBMGA11491-R  | CCCTACCATAACTGCACGTAAAA  |
| BGIBMGA11523-F  | CGCCTAAAGATCTATCAGAAGCA  |
| BGIBMGA11523-R  | GTTATTGGACTCTCCATGCACTC  |

| siRNA name  | siRNA sequence (5'-3') | purpose |
|-------------|------------------------|---------|
| siGFP-guide | AUAGACGUUGUGGCUGUUGUA  | RNAi    |



|                    |                       |
|--------------------|-----------------------|
| siGFP-passenger    | CAACAGCCACAACGUCUAUUU |
| siBmHP1a-guide     | CAGUUCUGGUAGGAAAGGUCG |
| siBmHP1a-passenger | ACCUUCCUACCAGAACUGUU  |
| siBmHP1b-guide     | UCAGCUUCUUUCUUCUUUCUU |
| siBmHP1b-passenger | GAAAGAAGAAAGAAGCUGAUU |

---

---

Supplementary Table 2. Full length cDNA libraries used for Fig. S10.

| <b>Name of full-length cDNA library</b>                 | <b>No. of Clones</b> | <b>Vector</b> | <b>Method</b> |
|---------------------------------------------------------|----------------------|---------------|---------------|
| BmN (cultured cell)                                     | 20736                | pCMVFL        | Oligo-cap     |
| fe8d (embryo day 8)                                     | 18731                | pGCAP10       | V-cap         |
| fwd (wing disc, 5th larva)                              | 24960                | pCMVFL        | Oligo-cap     |
| MFB (fat body, microbe-infected)                        | 10368                | pGCAP1        | G-cap         |
| bmmt (malpighian tubule, 5th larva)                     | 10534                | pGCAP10       | V-cap         |
| bmnc (cultured cell, NPV infected; 20hr postinfection ) | 10281                | pGCAP10       | V-cap         |
| bmov (ovary, pupa day 4)                                | 10708                | pGCAP10       | V-cap         |
| bmte (testis, pupa day 4)                               | 10723                | pGCAP10       | V-cap         |
| famL (antenna & maxillary glalea, 5th larva)            | 25972                | pGCAP10       | V-cap         |
| fcaL (corpora allata-cardiaca, 5th larva)               | 33462                | pGCAP1        | G-cap         |
| fner (nerve system + brain, 5th larva)                  | 37074                | pGCAP10       | V-cap         |
| fmgV (midgut, 5th larva)                                | 38020                | pGCAP10       | V-cap         |
| ftes (testis, 5th larva)                                | 29669                | pGCAP10       | V-cap         |
| fufe (unfertilized egg)                                 | 17095                | pGCAP10       | V-cap         |
| fwgP (wing, pupa day 2–8)                               | 17521                | pGCAP10       | V-cap         |

Supplementary Table 3 (A) Annotation list of downregulated genes selected in Fig. 6A

| genemodel names | annotation                                                                   | e.value | RPKM(siHP1a)<br>/RPKM(siGFP) |
|-----------------|------------------------------------------------------------------------------|---------|------------------------------|
| BGIBMGA004454   | low molecular mass 30 kDa lipoprotein 21G1-like precursor [Bombyx mori]      | 1e-179, | 0.08101521                   |
| BGIBMGA006109   | BmHP1a                                                                       | 8e-91,  | 0.122335689                  |
| BGIBMGA009103   | sterol carrier protein x [Bombyx mori]                                       | 0.0,    | 0.512934047                  |
| BGIBMGA010229   | PREDICTED: uncharacterized protein C31H12.03c-like [Bombyx mori]             | 7e-171, | 0.546441258                  |
| BGIBMGA004343   | death-related protein [Bombyx mori]                                          | 2e-67,  | 0.569799602                  |
| BGIBMGA010437   | PREDICTED: tubulin-specific chaperone C-like [Bombyx mori]                   | 0.0,    | 0.605804028                  |
| BGIBMGA012125   | uncharacterized protein LOC100216501 [Bombyx mori]                           | 6e-118, | 0.609788981                  |
| BGIBMGA010450   | no hit                                                                       |         | 0.611755647                  |
| BGIBMGA006574   | heat shock 70 kDa protein 14-like [Bombyx mori]                              | 0.0,    | 0.616839054                  |
| BGIBMGA003356   | PREDICTED: HIG1 domain family member 1A, mitochondrial-like isoform [Bom]    | 1e-51,  | 0.623584191                  |
| BGIBMGA013201   | 14-3-3 epsilon protein [Bombyx mori]                                         | 0.0,    | 0.628240196                  |
| BGIBMGA003466   | PREDICTED: FUN14 domain-containing protein 1A-like isoform X1 [Bombyx m      | 8e-89,  | 0.632056115                  |
| BGIBMGA006865   | creb [Bombyx mori]                                                           | 0.0,    | 0.632205099                  |
| BGIBMGA011668   | SoxE [Bombyx mori]                                                           | 6e-123, | 0.633168491                  |
| BGIBMGA006779   | PREDICTED: probable protein phosphatase CG10417-like [Bombyx mori]           | 0.0,    | 0.635689466                  |
| BGIBMGA013782   | PREDICTED: uncharacterized protein LOC101746461 [Bombyx mori]                | 7e-73,  | 0.655997284                  |
| BGIBMGA007844   | PREDICTED: surfeit locus protein 6 homolog [Bombyx mori]                     | 1e-43,  | 0.661998892                  |
| BGIBMGA006158   | prohibitin protein WPH [Bombyx mori]                                         | 0.0,    | 0.666196218                  |
| BGIBMGA012537   | mitochondrial ribosomal protein L32 [Bombyx mori]                            | 3e-143, | 0.671096729                  |
| BGIBMGA004834   | PREDICTED: RRP15-like protein-like isoform X1 [Bombyx mori]                  | 4e-141, | 0.673895709                  |
| BGIBMGA000243   | PREDICTED: protein FAM32A-like [Bombyx mori]                                 | 5e-47,  | 0.676344678                  |
| BGIBMGA011450   | uncharacterized protein LOC692929 [Bombyx mori]                              | 2e-115, | 0.676983287                  |
| BGIBMGA004250   | PREDICTED: protein PXR1-like [Bombyx mori]                                   | 1e-58,  | 0.680299462                  |
| BGIBMGA005564   | PREDICTED: ribosome biogenesis regulatory protein homolog [Bombyx mori]      | 0.0,    | 0.680749704                  |
| BGIBMGA008501   | PREDICTED: LOW QUALITY PROTEIN: serine/threonine-protein phosphatase [B      | 9e-177, | 0.681532007                  |
| BGIBMGA004635   | nucleolar phosphoprotein [Bombyx mori]                                       | 1e-90,  | 0.683895144                  |
| BGIBMGA005372   | PREDICTED: LDLR chaperone boca-like isoform X1 [Bombyx mori]                 | 4e-106, | 0.684003287                  |
| BGIBMGA011922   | alcohol dehydrogenase [Bombyx mori]                                          | 0.0,    | 0.684484824                  |
| BGIBMGA007941   | PREDICTED: BTB/POZ and MATH domain-containing protein 2-like [Bombyx m       | 6e-159, | 0.688337694                  |
| BGIBMGA012298   | 6-phosphogluconate dehydrogenase [Bombyx mori]                               | 0.0,    | 0.68835626                   |
| BGIBMGA005495   | PREDICTED: PRKR-interacting protein 1 homolog [Bombyx mori]                  | 5e-86,  | 0.694816662                  |
| BGIBMGA009021   | PREDICTED: calcyclin-binding protein-like [Bombyx mori]                      | 1e-157, | 0.695660552                  |
| BGIBMGA012559   | PREDICTED: U3 small nucleolar RNA-associated protein 18 homolog [Bombyx      | 0.0,    | 0.695690706                  |
| BGIBMGA010225   | peroxisomal biogenesis factor 3 [Bombyx mori]                                | 0.0,    | 0.697521138                  |
| BGIBMGA006105   | PREDICTED: rRNA-processing protein UTP23 homolog isoform X1 [Bombyx m        | 1e-106, | 0.699270952                  |
| BGIBMGA011004   | DDRGK domain-containing protein 1 precursor [Bombyx mori]                    | 1e-63,  | 0.700016742                  |
| BGIBMGA000177   | PREDICTED: transmembrane protein 70 homolog, mitochondrial-like [Bombyx      | 6e-157, | 0.700447787                  |
| BGIBMGA012045   | small nuclear ribonucleoprotein protein F [Bombyx mori]                      | 1e-52,  | 0.703583863                  |
| BGIBMGA007107   | TPR-repeat protein [Bombyx mori]                                             | 0.0,    | 0.704903515                  |
| BGIBMGA006980   | PREDICTED: nucleolar protein 12-like [Bombyx mori]                           | 1e-90,  | 0.709179107                  |
| BGIBMGA012508   | RNA binding motif protein X-linked 2 [Bombyx mori]                           | 7e-51,  | 0.709574009                  |
| BGIBMGA000029   | nucleolar protein family A member 2 [Bombyx mori]                            | 1e-100, | 0.710415541                  |
| BGIBMGA000664   | uncharacterized protein LOC692928 [Bombyx mori]                              | 8e-96,  | 0.710900253                  |
| BGIBMGA012122   | PREDICTED: esterase FE4-like [Bombyx mori]                                   | 0.0,    | 0.712063046                  |
| BGIBMGA008675   | PREDICTED: probable 28S ribosomal protein S26, mitochondrial-like [Bombyx    | 9e-156, | 0.712079177                  |
| BGIBMGA011070   | PREDICTED: THO complex subunit 7 homolog isoform X1 [Bombyx mori]            | 1e-133, | 0.714418819                  |
| BGIBMGA006022   | PREDICTED: Ia protein homolog isoform X1 [Bombyx mori]                       | 0.0,    | 0.717607935                  |
| BGIBMGA005023   | PREDICTED: cell growth-regulating nucleolar protein-like isoform [Bombyx m   | 0.0,    | 0.71844501                   |
| BGIBMGA008532   | N-acetyltransferase [Bombyx mori]                                            | 4e-137, | 0.719538206                  |
| BGIBMGA000990   | PREDICTED: exonuclease 3'-5' domain-containing protein 1-like [Bombyx mori]  | 4e-173, | 0.720246495                  |
| BGIBMGA009133   | beta-tubulin [Bombyx mori]                                                   | 0.0,    | 0.720447058                  |
| BGIBMGA008650   | PREDICTED: cyclin-dependent kinases regulatory subunit 1-like [Bombyx mori]  | 3e-65,  | 0.720557139                  |
| BGIBMGA014593   | PREDICTED: alpha-ketoglutarate-dependent dioxygenase alkB homolog [Bom       | 0.0,    | 0.722971148                  |
| BGIBMGA000382   | nuclear migration protein nudC [Bombyx mori]                                 | 6e-104, | 0.723479907                  |
| BGIBMGA007224   | PREDICTED: 28 kDa heat- and acid-stable phosphoprotein-like [Bombyx mori]    | 7e-46,  | 0.724038669                  |
| BGIBMGA001627   | no hit                                                                       |         | 0.727797495                  |
| BGIBMGA013785   | PREDICTED: uncharacterized protein LOC101746975 [Bombyx mori]                | 3e-103, | 0.728450461                  |
| BGIBMGA011314   | DnaJ-8 [Bombyx mori]                                                         | 0.0,    | 0.730150666                  |
| BGIBMGA011253   | PREDICTED: 26S proteasome complex subunit DSS1-like [Bombyx mori]            | 2e-31,  | 0.735777287                  |
| BGIBMGA000122   | no hit                                                                       |         | 0.736365903                  |
| BGIBMGA007405   | PREDICTED: PEST proteolytic signal-containing nuclear protein-like [Bombyx r | 1e-61,  | 0.738379836                  |
| BGIBMGA011019   | endothelial-monocyte activating polypeptide II [Bombyx mori]                 | 9e-156, | 0.739695838                  |
| BGIBMGA005319   | PREDICTED: density-regulated protein-like [Bombyx mori]                      | 3e-109, | 0.741907625                  |
| BGIBMGA011334   | thymosin isoform 1 [Bombyx mori]                                             | 6e-95,  | 0.742606311                  |
| BGIBMGA008899   | U6 snRNA-associated Sm-like protein [Bombyx mori]                            | 4e-82,  | 0.742937823                  |
| BGIBMGA007263   | PREDICTED: ribosomal L1 domain-containing protein CG13096-like [Bombyx r     | 0.0,    | 0.743485571                  |
| BGIBMGA011531   | PREDICTED: uncharacterized protein LOC101743953 [Bombyx mori]                | 0.0,    | 0.744715559                  |
| BGIBMGA007010   | PREDICTED: charged multivesicular body protein 6-A-like [Bombyx mori]        | 1e-97,  | 0.744715828                  |
| BGIBMGA007297   | PREDICTED: protein SDA1 homolog [Bombyx mori]                                | 0.0,    | 0.744991911                  |
| BGIBMGA011092   | PREDICTED: ribosome production factor 2 homolog [Bombyx mori]                | 0.0,    | 0.746774281                  |
| BGIBMGA003153   | DnaJ (Hsp40) homolog 3 [Bombyx mori]                                         | 0.0,    | 0.7482602                    |

|               |                                                                                       |         |             |
|---------------|---------------------------------------------------------------------------------------|---------|-------------|
| BGIBMGA010827 | PREDICTED: exosome complex component CSL4-like [Bombyx mori]                          | 2e-163, | 0.750182514 |
| BGIBMGA003562 | NADH dehydrogenase 1 alpha subcomplex subunit 5 [Bombyx mori]                         | 1e-72,  | 0.750976902 |
| BGIBMGA013713 | transport protein Sec61 gamma subunit [Bombyx mori]                                   | 3e-32,  | 0.752148186 |
| BGIBMGA010278 | PIN2/TRF1-interacting protein [Bombyx mori]                                           | 1e-75,  | 0.752955428 |
| BGIBMGA010375 | no hit                                                                                |         | 0.754965973 |
| BGIBMGA012220 | PREDICTED: tetratricopeptide repeat protein 1-like [Bombyx mori]                      | 0.0,    | 0.755670836 |
| BGIBMGA004850 | ubiquitin-conjugating enzyme E2 J1-like [Bombyx mori]                                 | 0.0,    | 0.755674486 |
| BGIBMGA011143 | PREDICTED: uncharacterized protein LOC101742884 [Bombyx mori]                         | 0.0,    | 0.756451237 |
| BGIBMGA014064 | PREDICTED: RNA-binding protein pno1-like [Bombyx mori]                                | 9e-156, | 0.756866299 |
| BGIBMGA011919 | <b>PREDICTED: ribosomal RNA-processing protein 7 homolog A-like</b>                   | 3e-88,  | 0.757323197 |
| BGIBMGA013514 | PREDICTED: coiled-coil domain-containing protein 124-like isoform                     | 1e-100, | 0.757368301 |
| BGIBMGA001363 | <b>40S ribosomal protein S21 [Bombyx mori]</b>                                        | 7e-55,  | 0.760819988 |
| BGIBMGA004540 | heat shock protein hsp 19.9 [Bombyx mori]                                             | 1e-129, | 0.761054352 |
| BGIBMGA008493 | PREDICTED: LSM domain-containing protein 1-like [Bombyx mori]                         | 8e-78,  | 0.761302254 |
| BGIBMGA012126 | PREDICTED: eukaryotic translation initiation factor 3 subunit [Bombyx mori]           | 0.0,    | 0.763599101 |
| BGIBMGA008648 | PREDICTED: dystrophin, isoform D-like [Bombyx mori]                                   | 1e-146, | 0.764952454 |
| BGIBMGA005160 | PREDICTED: probable cardiolipin synthase-like [Bombyx mori]                           | 0.0,    | 0.765944096 |
| BGIBMGA012474 | PREDICTED: huntingtin-interacting protein K-like [Bombyx mori]                        | 6e-80,  | 0.766051654 |
| BGIBMGA007192 | no hit                                                                                |         | 0.766118747 |
| BGIBMGA003699 | PREDICTED: LIN1-like protein-like [Bombyx mori]                                       | 1e-72,  | 0.767301601 |
| BGIBMGA001189 | PREDICTED: uncharacterized protein LOC101739083 isoform X3 [Bombyx mori]              | 9e-80,  | 0.767367538 |
| BGIBMGA005939 | PREDICTED: protein CWC15 homolog [Bombyx mori]                                        | 2e-136, | 0.767664559 |
| BGIBMGA001136 | signal peptidase complex subunit 3 [Bombyx mori]                                      | 1e-73,  | 0.768999151 |
| BGIBMGA009041 | PREDICTED: zinc finger HIT domain-containing protein 1-like [Bombyx mori]             | 5e-58,  | 0.769600194 |
| BGIBMGA012931 | PREDICTED: protein windbeutel-like [Bombyx mori]                                      | 2e-173, | 0.770533823 |
| BGIBMGA003609 | PREDICTED: adenylate kinase isoenzyme 6 homolog [Bombyx mori]                         | 2e-131, | 0.770601763 |
| BGIBMGA000374 | PREDICTED: sentrin-specific protease 6-like isoform X2 [Bombyx mori]                  | 0.0,    | 0.770715896 |
| BGIBMGA011798 | PREDICTED: leukocyte receptor cluster member 1 homolog [Bombyx mori]                  | 0.0,    | 0.770886205 |
| BGIBMGA009987 | PREDICTED: NADH dehydrogenase [ubiquinone] 1 beta subcomplex [Bombyx mori]            | 2e-72,  | 0.774068599 |
| BGIBMGA011782 | PREDICTED: putative RNA exonuclease NEF-sp-like [Bombyx mori]                         | 0.0,    | 0.774341396 |
| BGIBMGA006849 | PREDICTED: protein RER1-like isoform X1 [Bombyx mori]                                 | 2e-102, | 0.774586895 |
| BGIBMGA000921 | PREDICTED: ER membrane protein complex subunit 10-like isoform [Bombyx mori]          | 6e-147, | 0.774783249 |
| BGIBMGA002481 | PREDICTED: LOW QUALITY PROTEIN: cell division cycle 5-like protein-like [Bombyx mori] | 0.0,    | 0.776602491 |
| BGIBMGA000918 | S-phase kinase-associated protein [Bombyx mori]                                       | 3e-102, | 0.779635282 |
| BGIBMGA006789 | PREDICTED: malectin-like [Bombyx mori]                                                | 0.0,    | 0.780219484 |
| BGIBMGA008451 | PREDICTED: inositol-trisphosphate 3-kinase B-like [Bombyx mori]                       | 0.0,    | 0.780294126 |
| BGIBMGA005928 | <b>ribosomal protein L35 [Bombyx mori]</b>                                            | 1e-68,  | 0.780317404 |
| BGIBMGA006805 | PREDICTED: probable cytosolic iron-sulfur protein assembly protein [Bombyx mori]      | 0.0,    | 0.780457451 |
| BGIBMGA006376 | p23-like protein [Bombyx mori]                                                        | 3e-109, | 0.780785602 |
| BGIBMGA010930 | <b>rRNA processing protein Ebp2 [Bombyx mori]</b>                                     | 4e-168, | 0.780822395 |
| BGIBMGA010199 | PREDICTED: peptidyl-prolyl cis-trans isomerase FKBP2-like [Bombyx mori]               | 6e-88,  | 0.780921455 |
| BGIBMGA007493 | PREDICTED: transcription factor A, mitochondrial-like [Bombyx mori]                   | 2e-101, | 0.781546588 |
| BGIBMGA003923 | <b>ribosomal protein S24 [Bombyx mori]</b>                                            | 4e-85,  | 0.782159531 |
| BGIBMGA008301 | PREDICTED: 39S ribosomal protein L14, mitochondrial-like [Bombyx mori]                | 2e-73,  | 0.78351005  |
| BGIBMGA003669 | eukaryotic translation initiation factor 3 subunit E [Bombyx mori]                    | 0.0,    | 0.783791376 |
| BGIBMGA012563 | PREDICTED: uncharacterized protein LOC101740540 [Bombyx mori]                         | 0.0,    | 0.785131137 |
| BGIBMGA000926 | transaldolase [Bombyx mori]                                                           | 0.0,    | 0.785593652 |
| BGIBMGA012505 | PREDICTED: thioredoxin domain-containing protein-like isoform [Bombyx mori]           | 0.0,    | 0.786988854 |
| BGIBMGA011975 | PREDICTED: nucleolar protein 11-like [Bombyx mori]                                    | 0.0,    | 0.78702801  |
| BGIBMGA011296 | PREDICTED: UPF0562 protein C7orf55-like [Bombyx mori]                                 | 3e-53,  | 0.787288566 |
| BGIBMGA013131 | PREDICTED: apolipoprotein D-like [Bombyx mori]                                        | 3e-155, | 0.787394718 |
| BGIBMGA000381 | nuclear migration protein nudC [Bombyx mori]                                          | 5e-89,  | 0.7874625   |
| BGIBMGA014046 | <b>PREDICTED: pre-rRNA processing protein FTSJ3-like [Bombyx mori]</b>                | 0.0,    | 0.788407664 |
| BGIBMGA012708 | PREDICTED: spermine synthase-like [Bombyx mori]                                       | 3e-109, | 0.788603949 |
| BGIBMGA005381 | PREDICTED: KRR1 small subunit processome component homolog [Bombyx mori]              | 0.0,    | 0.789949448 |
| BGIBMGA010723 | small nuclear ribonucleoprotein sm d2 [Bombyx mori]                                   | 5e-60,  | 0.791432585 |
| BGIBMGA000440 | <b>PREDICTED: 39S ribosomal protein L47, mitochondrial-like [Bombyx mori]</b>         | 0.0,    | 0.791545306 |
| BGIBMGA011779 | PREDICTED: probable prefoldin subunit 4-like [Bombyx mori]                            | 4e-94,  | 0.791867536 |
| BGIBMGA007043 | PREDICTED: signal peptidase complex subunit 1-like [Bombyx mori]                      | 3e-42,  | 0.792523287 |
| BGIBMGA010337 | PREDICTED: RNA polymerase II transcriptional coactivator-like [Bombyx mori]           | 1e-49,  | 0.792821992 |
| BGIBMGA006735 | <b>PREDICTED: ribosome maturation protein SBDS-like [Bombyx mori]</b>                 | 0.0,    | 0.793411164 |
| BGIBMGA006711 | RNA binding motif protein 18 [Bombyx mori]                                            | 2e-102, | 0.794263931 |
| BGIBMGA010651 | PREDICTED: coiled-coil domain-containing protein 97-like [Bombyx mori]                | 0.0,    | 0.794830437 |
| BGIBMGA010845 | PREDICTED: protein BCCIP homolog [Bombyx mori]                                        | 8e-177, | 0.794948922 |
| BGIBMGA000399 | <b>ribosomal protein L20 [Bombyx mori]</b>                                            | 4e-116, | 0.795040314 |
| BGIBMGA001954 | PREDICTED: heterogeneous nuclear ribonucleoprotein K-like isoform [Bombyx mori]       | 3e-47,  | 0.796269044 |
| BGIBMGA002439 | PREDICTED: uncharacterized protein C9orf114 homolog isoform X1 [Bombyx mori]          | 0.0,    | 0.796412424 |
| BGIBMGA008477 | <b>PREDICTED: 39S ribosomal protein L17, mitochondrial-like [Bombyx mori]</b>         | 5e-150, | 0.796432247 |
| BGIBMGA010487 | <b>ribosomal protein L36A [Bombyx mori]</b>                                           | 1e-51,  | 0.796599336 |
| BGIBMGA001829 | PREDICTED: RNA exonuclease 4-like [Bombyx mori]                                       | 3e-15,  | 0.796802395 |
| BGIBMGA003544 | ubiquinol-cytochrome C reductase complex 14kD subunit [Bombyx mori]                   | 5e-54,  | 0.797259428 |
| BGIBMGA009685 | PREDICTED: transcriptional regulator ATRX homolog isoform X1 [Bombyx mori]            | 0.0,    | 0.797867295 |
| BGIBMGA003070 | PREDICTED: mitochondrial import inner membrane translocase subunit [Bombyx mori]      | 2e-62,  | 0.797998321 |
| BGIBMGA007068 | PREDICTED: U6 snRNA-associated Sm-like protein LSm5-like [Bombyx mori]                | 6e-54,  | 0.798209501 |

|               |                                                                                   |         |             |
|---------------|-----------------------------------------------------------------------------------|---------|-------------|
| BGIBMGA006964 | PREDICTED: ATP-binding cassette sub-family F member 3-like [Bombyx mori]          | 0.0,    | 0.798324304 |
| BGIBMGA010234 | DNA-directed RNA polymerase subunit 6-like protein [Bombyx mori]                  | 2e-65,  | 0.798481574 |
| BGIBMGA010262 | dynein molecular motor protein light chain 1 [Bombyx mori]                        | 3e-73,  | 0.798662512 |
| BGIBMGA006783 | tRNA (guanine-N(7)-)-methyltransferase [Bombyx mori]                              | 3e-118, | 0.798958607 |
| BGIBMGA003456 | PREDICTED: regulator of microtubule dynamics protein 1-like isoform [Bombyx mori] | 5e-176, | 0.799691624 |
| BGIBMGA013451 | PREDICTED: NADH dehydrogenase [ubiquinone] 1 alpha subcomplex [Bombyx mori]       | 1e-47,  | 0.799716096 |
| BGIBMGA006752 | PREDICTED: DNA-directed RNA polymerase II subunit RPB11-like [Bombyx mori]        | 1e-82,  | 0.799876534 |

Supplementary Table 3(B) Annotation list of upregulated genes selected in Fig. 6A

| genemodel names | annotation                                                                         | e.value   | RPKM(siHP1a)/<br>RPKM(siGFP) |
|-----------------|------------------------------------------------------------------------------------|-----------|------------------------------|
| BGIBMGA000119   | PREDICTED: porphobilinogen deaminase-like [Bombyx mori]                            | 0.0,      | 1.297359696                  |
| BGIBMGA000120   | PREDICTED: vacuolar protein sorting-associated protein 26-like                     | 0.0,      | 1.358466043                  |
| BGIBMGA000132   | neutral alpha-glucosidase AB-like precursor [Bombyx mori]                          | 0.0,      | 1.201527709                  |
| BGIBMGA000447   | PREDICTED: vesicle-fusing ATPase 1 [Bombyx mori]                                   | 0.0,      | 1.241107522                  |
| BGIBMGA000516   | PREDICTED: insulin-like growth factor 2 mRNA-binding protein [Bombyx mori]         | 0.0,      | 1.345981827                  |
| BGIBMGA000528   | PREDICTED: eukaryotic translation initiation factor 4 gamma 3-like [Bombyx mori]   | 0.0,      | 1.300253158                  |
| BGIBMGA000629   | PREDICTED: cold shock domain-containing protein E1-like isoform [Bombyx mori]      | 0.0,      | 1.388441393                  |
| BGIBMGA000672   | PREDICTED: probable citrate synthase 1, mitochondrial-like [Bombyx mori]           | 0.0,      | 1.219720971                  |
| BGIBMGA000714   | PREDICTED: proton-coupled amino acid transporter 1-like [Bombyx mori]              | 0.0,      | 1.350599706                  |
| BGIBMGA000808   | PREDICTED: LOW QUALITY PROTEIN: 5'-3' exoribonuclease 2 homolog [Bombyx mori]      | 0.0,      | 1.264804405                  |
| BGIBMGA001126   | PREDICTED: rab proteins geranylgeranyltransferase component A [Bombyx mori]        | 0.0,      | 1.246884653                  |
| BGIBMGA001266   | sprouty [Bombyx mori]                                                              | 2e-84,    | 1.301340647                  |
| BGIBMGA001646   | PREDICTED: uncharacterized protein LOC101741044 [Bombyx mori]                      | 0.0,      | 1.452842621                  |
| BGIBMGA001735   | PREDICTED: titin-like [Bombyx mori]                                                | 3e-128,   | 1.24330091                   |
| BGIBMGA001751   | PREDICTED: multiple coagulation factor deficiency protein 2 homolog [Bombyx mori]  | 7e-106,   | 1.395446743                  |
| BGIBMGA001787   | PREDICTED: uncharacterized protein LOC101738779 [Bombyx mori]                      | 0.0,      | 1.691149166                  |
| BGIBMGA001934   | PREDICTED: dystroglycan-like isoform X4 [Bombyx mori]                              | 0.0,      | 1.355362994                  |
| BGIBMGA001935   | PREDICTED: dystroglycan-like isoform X4 [Bombyx mori]                              | 0.0,      | 1.204332237                  |
| BGIBMGA002004   | ATP-binding cassette sub-family F member 2 [Bombyx mori]                           | 0.0,      | 1.426946366                  |
| BGIBMGA002012   | PREDICTED: importin-7-like isoform X1 [Bombyx mori]                                | 0.0,      | 1.337931173                  |
| BGIBMGA002013   | PREDICTED: importin-7-like isoform X2 [Bombyx mori]                                | 0.0,      | 1.226088923                  |
| BGIBMGA002504   | PREDICTED: GTP-binding protein SAR1b-like isoform X1 [Bombyx mori]                 | 4e-142,   | 1.283919596                  |
| BGIBMGA002551   | PREDICTED: zinc finger protein 1-like [Bombyx mori]                                | 0.0,      | 1.448775271                  |
| BGIBMGA002773   | annexin B13 [Bombyx mori]                                                          | 0.0,      | 1.300896395                  |
| BGIBMGA002779   | PREDICTED: FACT complex subunit spt16-like [Bombyx mori]                           | 0.0,      | 1.383967033                  |
| BGIBMGA002930   | PREDICTED: uncharacterized protein LOC101744916 isoform X1 [Bombyx mori]           | 0.0,      | 1.461357063                  |
| BGIBMGA002972   | PREDICTED: LOW QUALITY PROTEIN: importin subunit beta-1-like [Bombyx mori]         | 0.0,      | 1.251251846                  |
| BGIBMGA003014   | PREDICTED: cytochrome b5-like [Bombyx mori]                                        | 6e-102,   | 1.213711479                  |
| BGIBMGA003178   | PREDICTED: large neutral amino acids transporter small subunit [Bombyx mori]       | 0.0,      | 2.015558599                  |
| BGIBMGA003506   | PREDICTED: uncharacterized protein LOC101740603 [Bombyx mori]                      | 0.0,      | 1.20347463                   |
| BGIBMGA003656   | cystathionine gamma-lyase [Bombyx mori]                                            | 0.0,      | 1.835476064                  |
| BGIBMGA003681   | YK12 [Bombyx mori]                                                                 | 8e-75,    | 1.409123618                  |
| BGIBMGA003682   | YK13, partial [Bombyx mori]                                                        | 3e-132,   | 1.255321028                  |
| BGIBMGA003704   | heat shock factor-d [Bombyx mori]                                                  | 0.0,      | 1.207047817                  |
| BGIBMGA003742   | PREDICTED: phospholipid scramblase 1-like isoform X1 [Bombyx mori]                 | 3e-161,   | 1.213099112                  |
| BGIBMGA004021   | G protein alpha subunit Go isoform 1 [Bombyx mori]                                 | 3e-99,    | 1.414760612                  |
| BGIBMGA004022   | guanine nucleotide-binding protein G(o) subunit alpha 1 isoform [Bombyx mori]      | 3e-144,   | 1.311164656                  |
| BGIBMGA004126   | PREDICTED: ankyrin repeat and LEM domain-containing protein 1-like [Bombyx mori]   | 0.0,      | 1.442294799                  |
| BGIBMGA004626   | heterotrimeric guanine nucleotide-binding protein beta subunit [Bombyx mori]       | 0.0,      | 1.332672182                  |
| BGIBMGA004819   | calcium-binding protein p22 [Bombyx mori]                                          | 7e-92,    | 1.252564761                  |
| BGIBMGA004852   | PREDICTED: protein transport protein Sec23A-like isoform X1 [Bombyx mori]          | 0.0,      | 1.285763523                  |
| BGIBMGA004857   | PREDICTED: adenylosuccinate synthetase-like [Bombyx mori]                          | 5e-44,    | 1.227170808                  |
| BGIBMGA004972   | PREDICTED: ETS-like protein pointed, isoform P2/D-like [Bombyx mori]               | 2e-99,    | 1.270838546                  |
| BGIBMGA004973   | no hit                                                                             |           | 1.210475785                  |
| BGIBMGA004989   | PREDICTED: uncharacterized protein LOC101738733 isoform X1 [Bombyx mori]           | 0.0,      | 1.24721232                   |
| BGIBMGA005058   | PREDICTED: sodium/potassium-transporting ATPase subunit alpha-like [Bombyx mori]   | 0.0,      | 1.20234357                   |
| BGIBMGA005068   | PREDICTED: uncharacterized protein LOC101742323 [Bombyx mori]                      | 0.0,      | 1.497033882                  |
| BGIBMGA005115   | small GTP-binding protein [Bombyx mori]                                            | 4e-151,   | 1.232576649                  |
| BGIBMGA005468   | PREDICTED: clustered mitochondria protein homolog [Bombyx mori]                    | 0.0,      | 1.336506289                  |
| BGIBMGA005834   | cactus [Bombyx mori]                                                               | 0.0,      | 1.237287189                  |
| BGIBMGA005861   | no hit                                                                             | 9.00E-106 | 1.290194138                  |
| BGIBMGA006045   | small GTP binding protein RAB5 [Bombyx mori]                                       | 6e-151,   | 1.356162152                  |
| BGIBMGA006475   | PREDICTED: ras-related C3 botulinum toxin substrate 1-like isoform [Bombyx mori]   | 2e-89,    | 1.225155291                  |
| BGIBMGA006518   | PREDICTED: peroxidase-like isoform X1 [Bombyx mori]                                | 0.0,      | 1.330959502                  |
| BGIBMGA006590   | PREDICTED: syntaxin-1A-like isoform X4 [Bombyx mori]                               | 6e-161,   | 1.37189894                   |
| BGIBMGA006627   | PREDICTED: RNA polymerase I-specific transcription initiation [Bombyx mori]        | 0.0,      | 1.246019054                  |
| BGIBMGA006766   | ecdysone receptor isoform B2 [Bombyx mori]                                         | 2e-81,    | 1.673188165                  |
| BGIBMGA006809   | kinesin heavy chain [Bombyx mori]                                                  | 0.0,      | 1.276999662                  |
| BGIBMGA006959   | PREDICTED: armadillo segment polarity protein-like [Bombyx mori]                   | 0.0,      | 1.240659279                  |
| BGIBMGA007012   | PREDICTED: extracellular serine/threonine protein kinase FAM20C-like [Bombyx mori] | 0.0,      | 1.34282547                   |
| BGIBMGA007110   | PREDICTED: ras-related C3 botulinum toxin substrate 1-like [Bombyx mori]           | 6e-135,   | 1.282917484                  |
| BGIBMGA007133   | PREDICTED: TATA-binding protein-associated factor 172-like [Bombyx mori]           | 0.0,      | 1.309619906                  |
| BGIBMGA007159   | PREDICTED: probable isocitrate dehydrogenase [NAD] subunit alpha [Bombyx mori]     | 9e-81,    | 1.234550042                  |
| BGIBMGA007169   | ras-like protein 1 [Bombyx mori]                                                   | 4e-134,   | 1.843636686                  |

|               |                                                                                 |           |             |
|---------------|---------------------------------------------------------------------------------|-----------|-------------|
| BGIBMGA007418 | adenosine kinase [Bombyx mori]                                                  | 0.0,      | 1.226732907 |
| BGIBMGA007519 | PREDICTED: E3 ubiquitin-protein ligase hyd-like [Bombyx mori]                   | 0.0,      | 1.317251515 |
| BGIBMGA007808 | DnaJ (Hsp40) homolog 7 [Bombyx mori]                                            | 2e-104,   | 1.340274128 |
| BGIBMGA007948 | PREDICTED: spectrin alpha chain-like [Bombyx mori]                              | 0.0,      | 1.232294941 |
| BGIBMGA007964 | PREDICTED: nucleolin-like isoform X2 [Bombyx mori]                              | 6e-73,    | 1.255099632 |
| BGIBMGA008337 | PREDICTED: protein TIS11-like isoform X2 [Bombyx mori]                          | 7e-101,   | 1.306793549 |
| BGIBMGA008425 | PREDICTED: LOW QUALITY PROTEIN: 26S proteasome non-ATPase regulatory            | 0.0,      | 1.236959738 |
| BGIBMGA008498 | PREDICTED: synaptobrevin homolog YKT6-like [Bombyx mori]                        | 7e-148,   | 1.29029656  |
| BGIBMGA008780 | ferritin precursor [Bombyx mori]                                                | 4e-169,   | 1.870931229 |
| BGIBMGA008927 | PREDICTED: probable actin-related protein 2/3 complex subunit [Bombyx mori]     | 0.0,      | 1.213975049 |
| BGIBMGA009049 | PREDICTED: niemann-Pick C1 protein-like isoform X1 [Bombyx mori]                | 0.0,      | 1.331433542 |
| BGIBMGA009223 | PREDICTED: LOW QUALITY PROTEIN: E3 ubiquitin-protein ligase UBR1-like [B        | 0.0,      | 1.36724741  |
| BGIBMGA009227 | no hit                                                                          |           | 1.457972499 |
| BGIBMGA009248 | PREDICTED: T-complex protein 11-like protein 1-like [Bombyx mori]               | 0.0,      | 1.268345293 |
| BGIBMGA009282 | PREDICTED: protein kinase C and casein kinase substrate in neurons [Bombyx      | 0.0,      | 1.350100658 |
| BGIBMGA009770 | ced-6 protein [Bombyx mori]                                                     | 0.0,      | 1.344875175 |
| BGIBMGA009941 | PREDICTED: ubiquitin carboxyl-terminal hydrolase 5-like [Bombyx mori]           | 0.0,      | 1.261981919 |
| BGIBMGA010176 | PREDICTED: uncharacterized protein LOC101740250 [Bombyx mori]                   | 0.0,      | 1.210275242 |
| BGIBMGA010365 | uncharacterized protein LOC692518 [Bombyx mori]                                 | 0.0,      | 1.260135785 |
| BGIBMGA010406 | argonaute 2 [Bombyx mori]                                                       | 0.0,      | 1.327604648 |
| BGIBMGA010541 | PREDICTED: ubiquitin-conjugating enzyme E2-17 kDa-like isoform [Bombyx m        | 4e-71,    | 1.939143944 |
| BGIBMGA010576 | PREDICTED: protein numb-like isoform X1 [Bombyx mori]                           | 0.0,      | 1.209777418 |
| BGIBMGA010744 | PREDICTED: zinc finger protein on ecdysone puffs-like [Bombyx mori]             | 0.0,      | 1.257138107 |
| BGIBMGA010926 | PREDICTED: dual specificity testis-specific protein kinase 2-like [Bombyx mori] | 1e-82,    | 1.282391009 |
| BGIBMGA011089 | sex combs on midleg [Bombyx mori]                                               | 0.0,      | 1.323249689 |
| BGIBMGA011144 | PREDICTED: peroxisomal biogenesis factor 19-like [Bombyx mori]                  | 3e-177,   | 1.322123409 |
| BGIBMGA011364 | PREDICTED: choline/ethanolamine kinase-like isoform X3 [Bombyx mori]            | 0.0,      | 1.247990477 |
| BGIBMGA011427 | PREDICTED: uncharacterized protein LOC101738318 [Bombyx mori]                   | 0.0,      | 1.345443442 |
| BGIBMGA011543 | dicer-2 [Bombyx mori]                                                           | 0.0,      | 1.399939728 |
| BGIBMGA011577 | PREDICTED: uncharacterized protein LOC101738278 [Bombyx mori]                   | 0.0,      | 1.268092435 |
| BGIBMGA011594 | PREDICTED: serine proteinase stubble-like [Bombyx mori]                         | 0.0,      | 1.245325038 |
| BGIBMGA011754 | PREDICTED: probable ATP-dependent RNA helicase DDX17-like isoform [Bom          | 0.0,      | 1.24092286  |
| BGIBMGA011809 | PREDICTED: zinc transporter ZIP11-like [Bombyx mori]                            | 2e-162,   | 1.361396196 |
| BGIBMGA011963 | PREDICTED: ubiquitin-conjugating enzyme E2 W-like isoform X2 [Bombyx mori]      | 2e-49,    | 1.281012432 |
| BGIBMGA011982 | PREDICTED: LOW QUALITY PROTEIN: low-density lipoprotein receptor-related        | 0.0,      | 1.436874655 |
| BGIBMGA012192 | PREDICTED: U4/U6.U5 small nuclear ribonucleoprotein 27 kDa protein-like [Bo     | 1e-55,    | 1.361703097 |
| BGIBMGA012428 | hnRNPA/B-like 28 [Bombyx mori]                                                  | 2e-50,    | 1.232321139 |
| BGIBMGA012428 | no hit                                                                          | 1.00E-114 | 1.401722905 |
| BGIBMGA012560 | glycerol-3-phosphate dehydrogenase-1 [Bombyx mori]                              | 0.0,      | 1.259662046 |
| BGIBMGA012935 | clathrin heavy chain [Bombyx mori]                                              | 0.0,      | 1.395128299 |
| BGIBMGA013231 | protein phosphatase 1 catalytic subunit [Bombyx mori]                           | 1e-97,    | 1.274741666 |
| BGIBMGA013312 | PREDICTED: LOW QUALITY PROTEIN: E3 ubiquitin-protein ligase CBL-like [Bo        | 4e-128,   | 1.274401083 |
| BGIBMGA013313 | PREDICTED: LOW QUALITY PROTEIN: E3 ubiquitin-protein ligase CBL-like [Bo        | 7e-158,   | 1.460250456 |
| BGIBMGA013510 | ribonucleoside diphosphate reductase small subunit [Bombyx mori]                | 0.0,      | 1.334397578 |
| BGIBMGA013960 | PREDICTED: probable ATP-dependent RNA helicase ddx17-like [Bombyx mori]         | 9e-143,   | 1.331078583 |
| BGIBMGA014091 | PREDICTED: uncharacterized protein LOC101736214, partial [Bombyx mori]          | 3e-160,   | 1.266487751 |
| BGIBMGA014106 | PREDICTED: SUZ domain-containing protein 1-like [Bombyx mori]                   | 8e-140,   | 1.221177005 |
| BGIBMGA014456 | PREDICTED: uncharacterized protein LOC101739986 [Bombyx mori]                   | 7e-158,   | 1.375421636 |
